# Supplementary material
Source: PubMed Central journal article supplement (PMC7115114)
Supplement: Supplementary_Data.pdf [file Supplementary_Data.pdf]

Figure S2. Positive control for immunohistochemistry of HOXD10. Colonic carcinoma tissue demonstrated strong staining. HOXD10 is positively stained in the nucleus and cytoplasm (x400). HOX, homeobox.

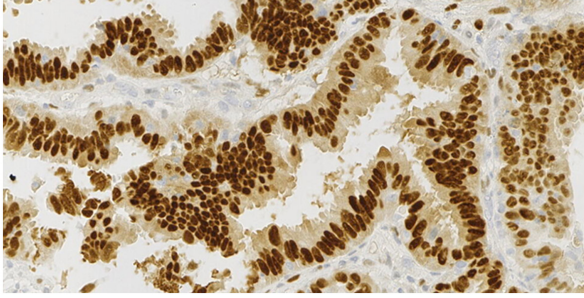

Table SI. Primer sequences and methylation-specific PCR conditions.

| Gene   | Primer | Sequences, 5'-3'          | Product    |         |
|--------|--------|---------------------------|------------|---------|
|        |        |                           | Length, BP | TM (°C) |
| HOXD10 | MF     | TTATTTATGGGGATTCGGGTTC    | 239        | 60      |
|        | MR     | AAAAAAACCGAATCCAAAACAAACG | 241        |         |
|        | UF     | ATTTATTTATGGGGATTTGGGTTC  |            |         |
|        | UR     | AAAAAAACCAAATCCAAAACAAACA |            |         |
| ZNF545 | MF     | TTTTTTTTAGGTTTTGTCGCGTC   |            | 177     |
|        | MR     | CTACTAAAAAACCGAACGCG      | 164        |         |
|        | UF     | TTTTTTTTAGGTTTTGTTGTGTTC  |            |         |
|        | UR     | CCAAACACACTCACAAAATACA    |            |         |
| PCDH17 | MF     | GATTATCGGGTGTCTAGTTC      |            | 87      |
|        | MR     | CCCTAACGCAACGTACGCG       | 90         |         |
|        | UF     | AGATTATGGGTGTTGTAGTTT     |            |         |
|        | UR     | AACCCTAACACAACATACACA     |            |         |
| MEIS1  | MF     | TGTAAGCGGGTAGTATCGATCG    |            | 203     |
|        | MR     | ATACACAAAACCCTAACGCTCG    | 192        |         |
|        | UF     | GGGATTGTAAGTGGGTAGTATT    |            |         |
|        | UR     | CACTCACTTCCCTTAAATCAA     |            |         |
| SHH    | MF     | GGAGAGTTTTTCGTAGTCGC      |            | 127     |
|        | MR     | CGTATACGCTCTCTTACGC       | 131        |         |
|        | UF     | GGTGGAGAGTTTTTTGTAGTTGT   |            |         |
|        | UR     | ACATATACACTCTCTTACACTT    |            |         |

MF, forward sequence of methylation primers; MR, reverse sequence of methylation primers; UF, forward sequence of un-methylation primers; UR, reverse sequence of un-methylation primers; BP, base pairs; TM, melting temperature.
